# Supplementary material for: Self-Harm in Eating Disorders (SHINE): a mixed-methods exploratory study
Source: PubMed Central journal article supplement (PMC9335036; doi:10.1136/bmjopen-2022-065065), 2022-07-27
Supplement: bmjopen-2022-065065.reviewer_comments.pdf [file bmjopen-2022-065065.reviewer_comments.pdf]

## PEER REVIEW HISTORY

BMJ Open publishes all reviews undertaken for accepted manuscripts. Reviewers are asked to complete a checklist review form (<http://bmjopen.bmj.com/site/about/resources/checklist.pdf>) and are provided with free text boxes to elaborate on their assessment. These free text comments are reproduced below.

## ARTICLE DETAILS

|                            |                                                                                                                                  |
|----------------------------|----------------------------------------------------------------------------------------------------------------------------------|
| <b>TITLE (PROVISIONAL)</b> | Self-Harm In Eating Disorders (SHINE): A Mixed-Methods Exploratory Study                                                         |
| <b>AUTHORS</b>             | Lavis, Anna; McNeil, Sheryllin; Bould, Helen; Winston, Anthony; Reid, Kalen; Easter, Christina; Pendrous, Rosina; Michail, Maria |

This article was not externally reviewed at BMJ Open. Protocols that have been independently assessed prior to submission to BMJ Open are usually fast-tracked to publication on the grounds that further substantial changes will not be possible. This independent assessment will usually be external, independent review for both a substantial grant award from a non-commercial or government funder and ethics approval.
